# Supplementary material for: The differential effects of metronomic gemcitabine and antiangiogenic treatment in patient-derived xenografts of pancreatic cancer: treatment effects on metabolism, vascular function, cell proliferation, and tumor growth
Source: Springer Nature journal article supplement (doi:10.1007/s10456-016-9503-z), 2016-03-09

**Additional File 1. Metronomic gemcitabine-treated PaCa8 tumors have better perfusion, higher intratumoral microvessel density, and less hypoxia than DC101-treated tumors.** Representative composite images of PaCa8 tumor sections on day 7 following initiation of treatment with vehicle (Veh-Ctrl; 0.9% saline), DC101 (800  $\mu$ g, q3d), or metronomic gemcitabine (Met-Gem; 30 mg/kg, q3d). The presence of Hoechst 33362 (blue) indicates tissue perfusion. Intratumoral microvessels and hypoxia are detected by CD31 (red) and EF5 (green) immunofluorescence staining, respectively. Necrotic regions (pale green) are outlined in yellow.

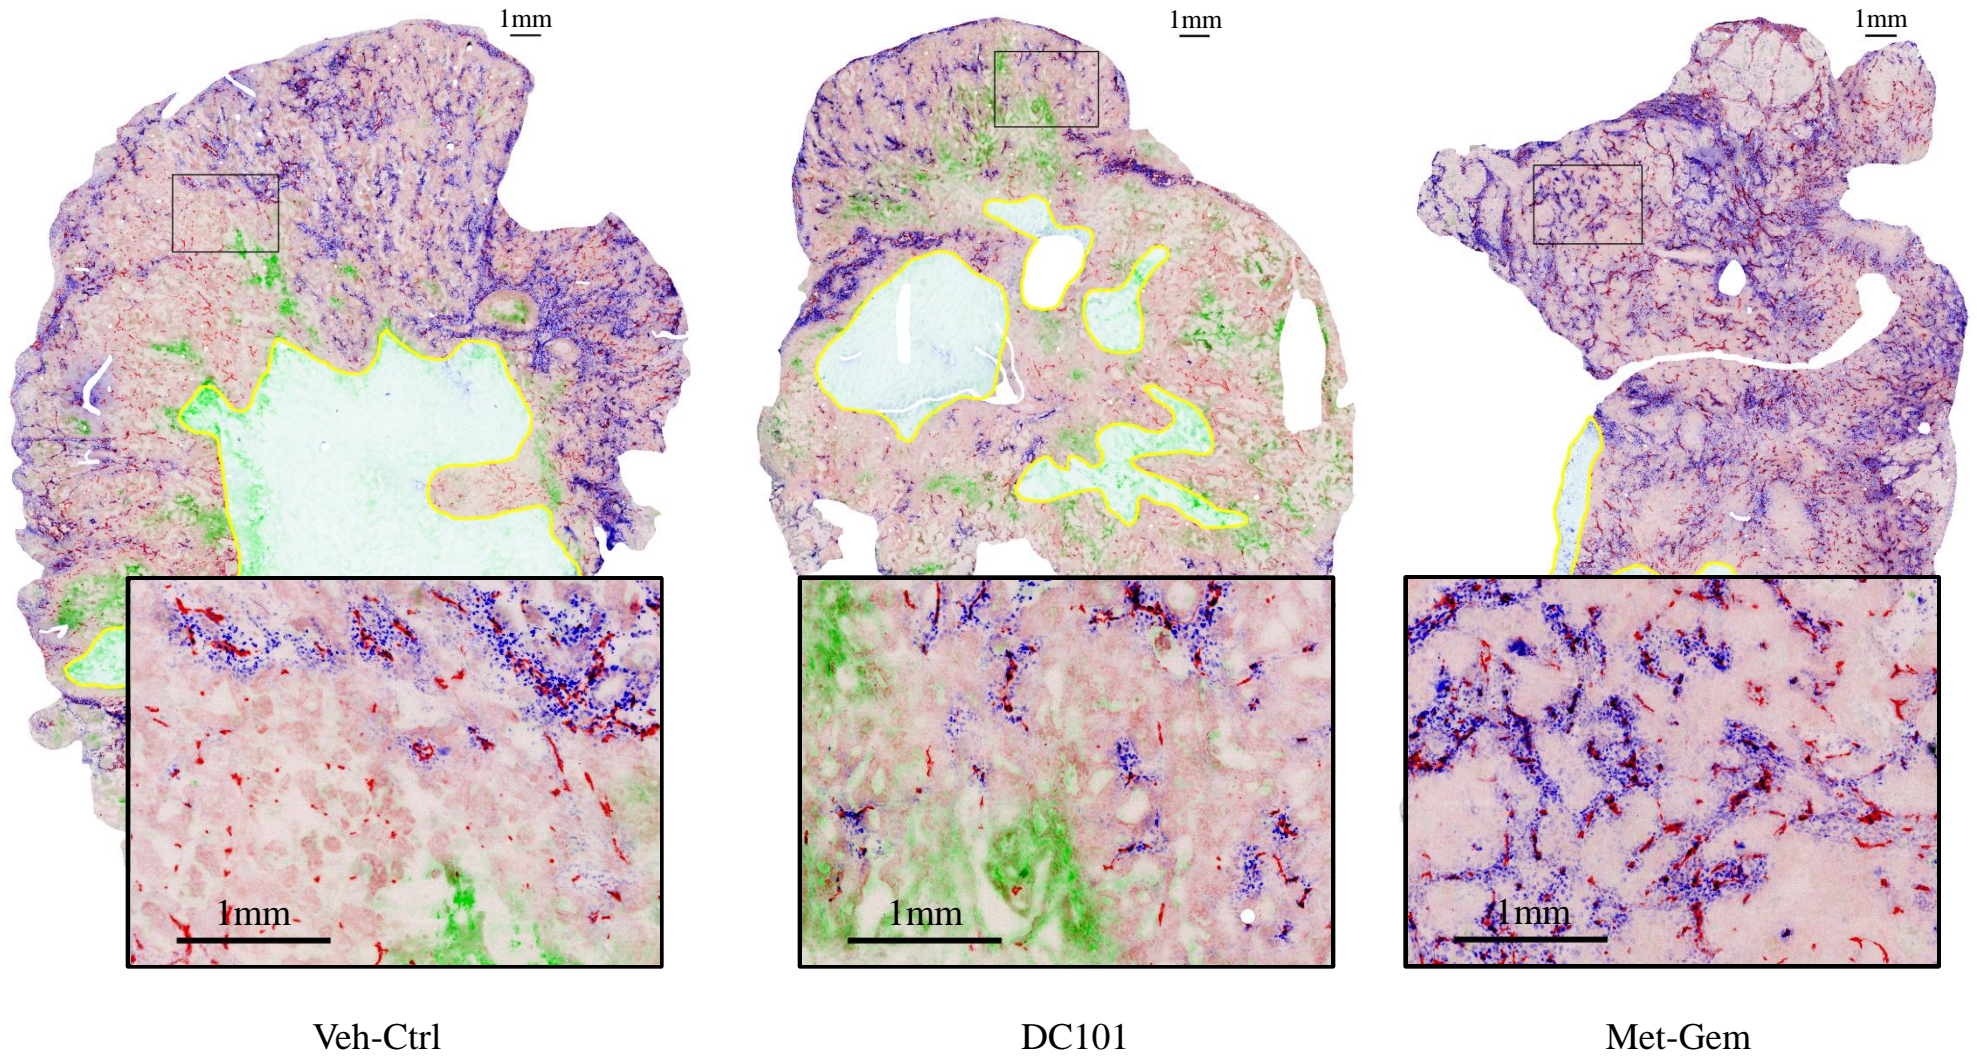

Supplement: MOESM1 [file 8816384]
