# Supplementary material for: The differential effects of metronomic gemcitabine and antiangiogenic treatment in patient-derived xenografts of pancreatic cancer: treatment effects on metabolism, vascular function, cell proliferation, and tumor growth
Source: Springer Nature journal article supplement (doi:10.1007/s10456-016-9503-z), 2016-03-09
Supplement: MOESM2 [file 8816384]

**Additional File 2. Protein levels of specific pro and antiangiogenic factors in the PaCa8 and PaCa13 tumors.** hVEGF, human vascular endothelial growth factor; mVEGF, mouse vascular endothelial growth factor; hPLGF, human placental growth factor; mPDGF-BB, mouse platelet-derived growth factor; hSDF-1, human stromal-derived factor-1; hTSP-1, human thrombospondin-1. <sup>a</sup>P<0.05 vs. day 3 of corresponding treatment group. <sup>b</sup>P<0.05 vs. day 7 of corresponding treatment group. <sup>c</sup>P<0.05 vs. the vehicle control group at each time point. <sup>d</sup>P<0.05 vs. the DC101 group at each time point. <sup>#</sup>n ≤ 3 as some sample concentrations were too low to detect. Data are presented as mean±SEM.

### PaCa8

| pg/mg protein   | Day 3                            |            |                         | Day 7      |                         |                           | Day 21     |                             |                           |
|-----------------|----------------------------------|------------|-------------------------|------------|-------------------------|---------------------------|------------|-----------------------------|---------------------------|
|                 | Veh-Ctrl                         | DC101      | Met- Gem                | Veh-Ctrl   | DC101                   | Met- Gem                  | Veh-Ctrl   | DC101                       | Met- Gem                  |
| hVEGF           | 205.3±30.9                       | 215.0±25.9 | 77.4±9.4 <sup>c,d</sup> | 281.6±42.2 | 363.9±42.4 <sup>a</sup> | 56.5±9.7 <sup>c,d</sup>   | 226.3±19.6 | 433.9±31.3 <sup>a,c</sup>   | 29.5±7.8 <sup>c,d</sup>   |
| mVEGF           | 139.4±38.0                       | 108.3±15.7 | 80.5±21.1               | 194.1±39.1 | 180.3±25.3              | 98.8±21.2                 | 212.1±34.2 | 379.7±62.5 <sup>a,b,c</sup> | 129.3±26.1 <sup>d,#</sup> |
| hPLGF           | Concentrations too low to detect |            |                         |            |                         |                           |            |                             |                           |
| mPDGF-BB        | 129.8±18.9                       | 124.9±19.9 | 66.4±11.0               | 171.1±32.8 | 171.1±32.8              | 40.4±6.3 <sup>a,c,d</sup> | 132.3±27.0 | 172.9±20.5                  | 22.8±8.7 <sup>a,c,d</sup> |
| mSDF-1 $\alpha$ | 88.7±26.6                        | 94.7±15.7  | 87.7±16.2               | 90.4±13.5  | 94.7±17.2               | 167.1±16.9 <sup>c,d</sup> | 96.3±19.2  | 81.8±7.2 <sup>#</sup>       | 143.4±60.5 <sup>#</sup>   |
| hTSP-1          | Concentrations too low to detect |            |                         |            |                         |                           |            |                             |                           |

### PaCa13

| pg/mg protein            | Day 3      |                         |                         | Day 7      |                         |                            | Day 21     |                       |                           |
|--------------------------|------------|-------------------------|-------------------------|------------|-------------------------|----------------------------|------------|-----------------------|---------------------------|
|                          | Veh-Ctrl   | DC101                   | Met- Gem                | Veh-Ctrl   | DC101                   | Met- Gem                   | Veh-Ctrl   | DC101                 | Met- Gem                  |
| hVEGF                    | 134.6±30.8 | 235.6±37.8 <sup>c</sup> | 101.8±24.1 <sup>d</sup> | 147.4±25.6 | 345.4±83.3 <sup>c</sup> | 33.4±11.6 <sup>a,c,d</sup> | 207.1±44.9 | 316.0±67.5            | 45.6±7.7 <sup>a,c,d</sup> |
| mVEGF                    | 98.1±20.4  | 150.0±22.7              | 43.7±8.6 <sup>d</sup>   | 103.3±12.2 | 241.0±17.0 <sup>c</sup> | 29.3±6.8 <sup>c,d</sup>    | 125.1±30.0 | 223.7±48.4            | 40.8±8.7 <sup>d</sup>     |
| hPLGF                    | 32.8±6.0   | 35.4±7.1                | 21.3±11.6               | 26.6±7.8   | 43.9±7.8                | 13.9 <sup>#</sup>          | 46.9±16.6  | 17.0±3.5 <sup>b</sup> | 15.4±0.6 <sup>#</sup>     |
| mPDGF-BB                 | 41.9±7.8   | 50.4±6.8                | 26.4±2.7 <sup>d</sup>   | 57.0±10.4  | 54.9±8.8                | 22.9±4.3                   | 50.6±11.9  | 37.4±5.1              | 31.0±4.8                  |
| mSDF-1 $\alpha$          | 142.7±27.7 | 151.5±28.7              | 149.7±24.2              | 152.8±21.9 | 134.6±18.3              | 137.7±30.9                 | 223.0±50.1 | 206.1±49.6            | 257.5±53.3                |
| hTSP-1 ( $\times 10^5$ ) | 10.3±1.5   | 12.0±0.7                | 10.0±1.6                | 12.3±2.4   | 8.8±1.1                 | 4.1±1.0 <sup>a,c</sup>     | 12.4±1.9   | 9.0±1.8               | 6.4±1.4 <sup>c</sup>      |
